# Supplementary material
Source: PubMed Central journal article supplement (PMC2518089)
Supplement: NIHMS62035-supplement-File001.pdf [file NIHMS62035-supplement-File001.pdf]

# **DevS, a Heme-Containing Two-Component Oxygen Sensor of *Mycobacterium tuberculosis*<sup>†</sup>**

Alexandra Ioanoviciu<sup>§</sup>, Erik T. Yukl<sup>‡</sup>, Pierre Moëgne-Loccoz<sup>‡</sup>, and Paul R. Ortiz de Montellano<sup>§\*</sup>

*§Department of Pharmaceutical Chemistry, University of California, 600 16<sup>th</sup> Street, San Francisco, California 94158-2517, and <sup>‡</sup>Department of Environmental & Biomolecular Systems, 20,000 NW Walker Road, OGI School of Science and Engineering, Oregon Health & Sciences University, Beaverton, Oregon 97006-8921*

## **FIGURE LEGENDS**

**FIGURE S1:** Safe stain (left figure) and in gel His tag stain (right figure) of DevS642 25330 Da. Lane 1. SeeBlue Plus 2 standard 7  $\mu$ L; Lane 2, tenfold dilution of whole cell sample BL21DE3 expressing DevS642 induced at 0.4 mM IPTG concentration; Lane 3, tenfold dilution of whole cell sample Rosetta 2 expressing DevS642 induced at 0.4 mM IPTG concentration; Lane 4, tenfold dilution of whole cell sample DH5 $\alpha$  expressing DevS642 induced at 0.4 mM IPTG concentration; Lane 5, tenfold dilution of whole cell sample BL21DE3 expressing both DevS642 and GroEL/ES induced at 1 mM IPTG concentration; Lane 6, tenfold dilution of whole cell sample DH5 $\alpha$  expressing both DevS642 and GroEL/ES induced at 1 mM IPTG concentration.

**FIGURE S2:** Expression of DevS642: Safe stain (left figure) and in gel His tag stain (right figure). Lane 1, tenfold dilution of whole cell sample expressing DevS642 induced at 1 mM IPTG concentration; Lane 2, tenfold dilution of whole cells expressing both DevS642 and GroEL/ES induced at 1 mM IPTG concentration; Lane 3, 20 fold dilution of whole cell sample expressing DevS642 induced at 1 mM IPTG concentration; Lane 4, 20-fold dilution of whole cells expressing both DevS642 and GroEL/ES induced at 1 mM IPTG concentration; Last lane, SeeBlue Plus 2 standard 7  $\mu$ L.

**FIGURE S3.** UV-visible spectra of: wt-DevS642  $\text{Fe}^{2+}$ -NO,  $\text{Fe}^{3+}$ -NO, and  $\text{Fe}^{2+}$ -O<sub>2</sub> complexes (A) and H149A DevS642  $\text{Fe}^{2+}$ -NO and  $\text{Fe}^{3+}$ -NO complexes (B).

**FIGURE S4.** UV-visible spectra of: wt-DevS full length: ferric, ferrous, and  $\text{Fe}^{2+}$ -CO complexes.

**FIGURE S5. Panel 1:** High frequency RR of ferric wt full length DevS (A), wt DevS642 (B), wt DevS642 parallel (C) and perpendicular (D) polarization. **Panel 2:** High frequency RR of ferrous wt full length DevS (A), wt DevS642 (B), wt DevS642 parallel (C) and perpendicular (D) polarization

**FIGURE S6.** Low-frequency RR of ferrous wt DevS642 (A) and full length DevS (B) at room temperature ( $\lambda_{\text{exc}} = 442$  nm; 15 mW).

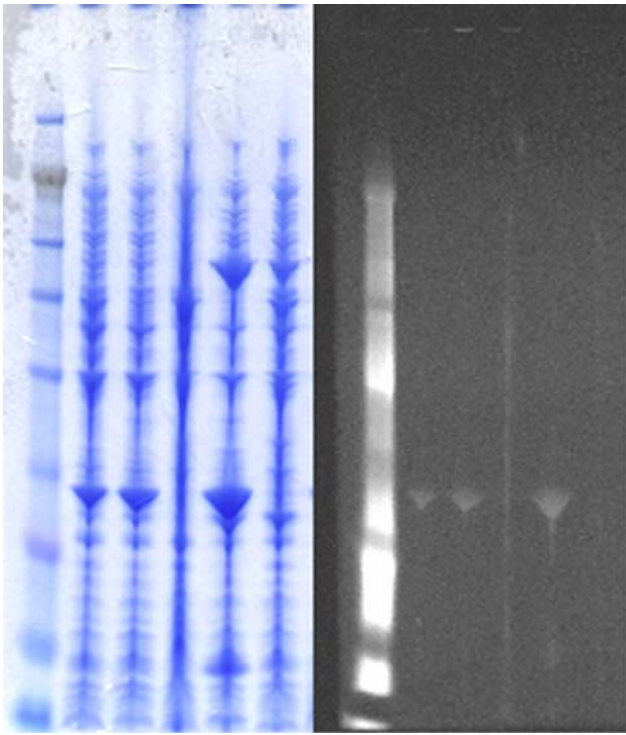

**Figure S1**

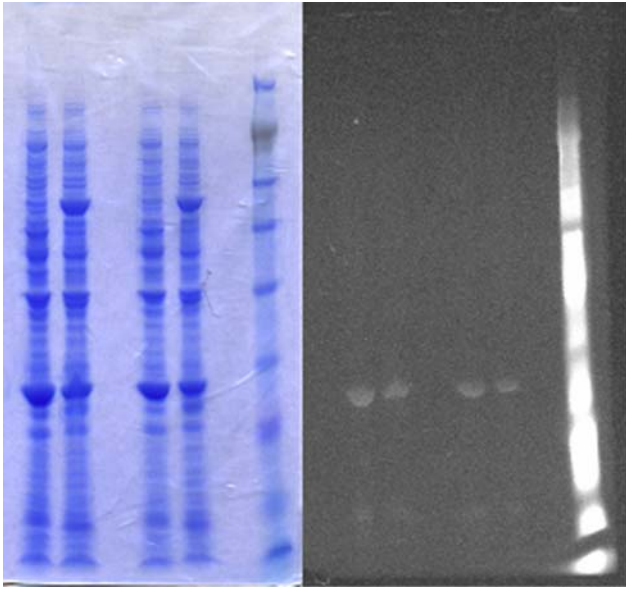

**Figure S2**

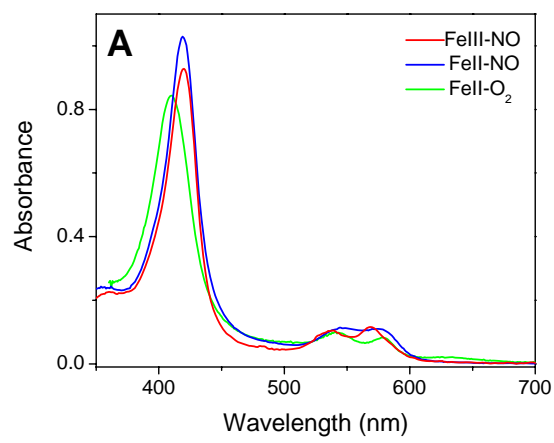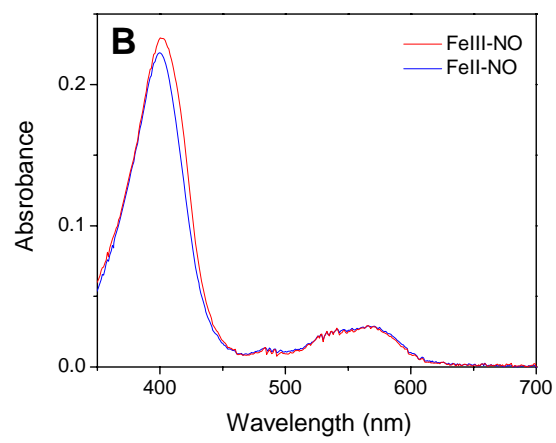

**Figure S3**

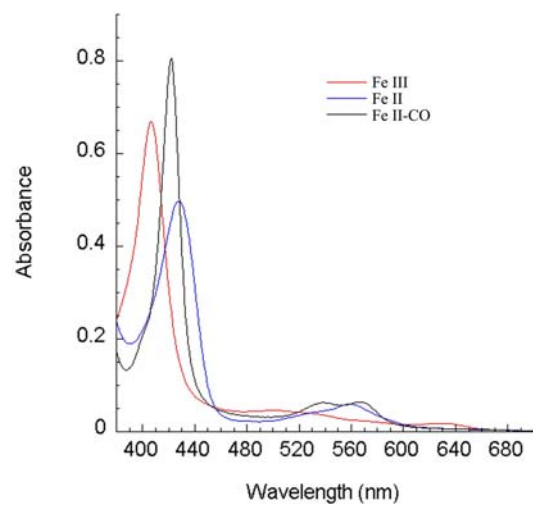

**FIGURE S4**

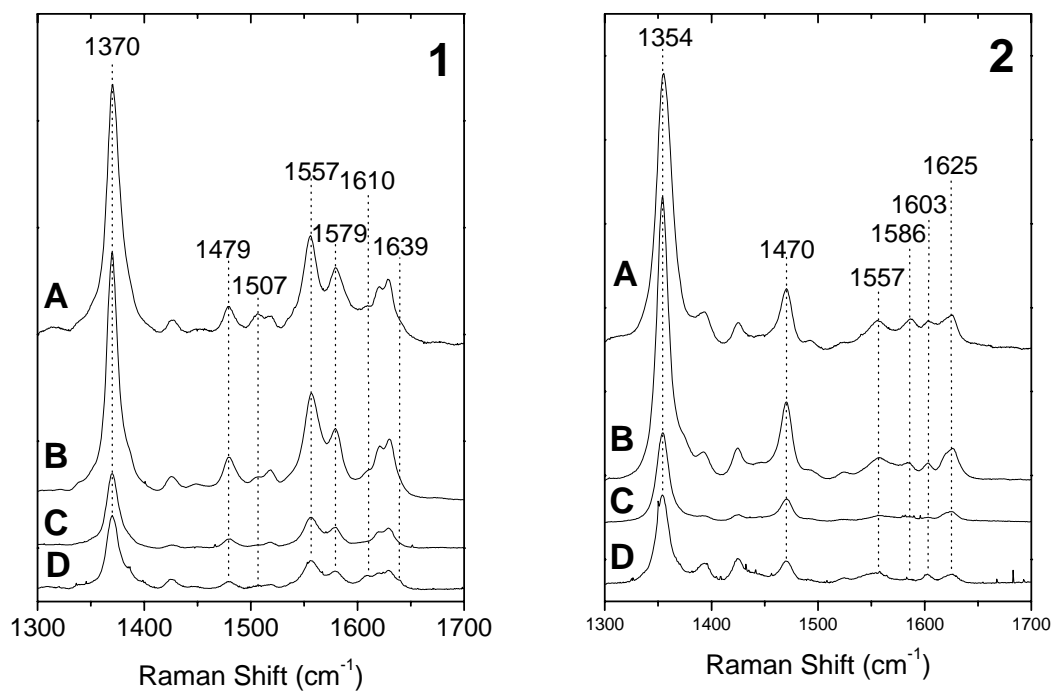

**FIGURE S5**

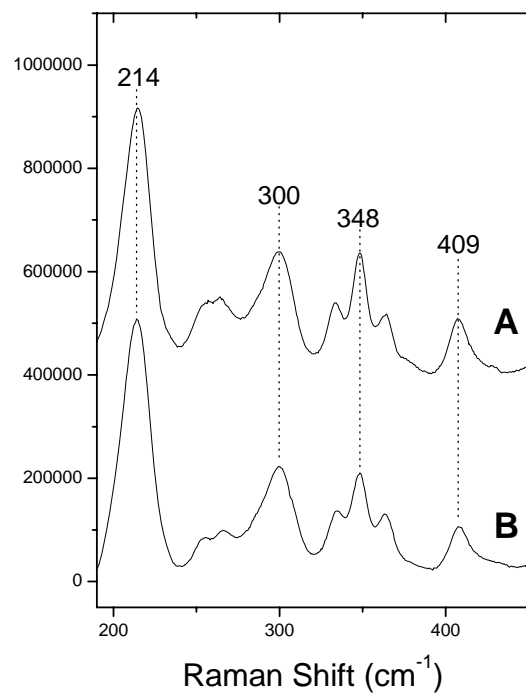

**FIGURE S6**
